# Supplementary material for: Sandwich-type CoSe2-CNWs@rGO/S composites with efficient trapping and catalytic conversion of polysulfides in lithium–sulfur batteries
Source: Royal Society of Chemistry journal article supplement (doi:10.1039/d2dt01774a), 2022-01-01
Supplement: d2dt01774a1.pdf [file d2dt01774a1.pdf]

## Supplementary Information

### **Sandwich-Type CoSe<sub>2</sub>-CNWs@rGO/S Composites with Efficient Trapping and Catalytic Conversion of Polysulfides in Lithium–Sulfur Batteries.**

Yuxiang Zhou<sup>a</sup>, Jianwei Zhang<sup>a</sup>, Chenyuan Zhao<sup>a</sup>, Tianyu Shi<sup>a</sup>, Haihong Yin<sup>a\*</sup>, Changqing Song<sup>a</sup>, Lin Qin<sup>a</sup>, Zhiliang Wang<sup>a</sup>, Haibao Shao<sup>a</sup>, and Ke Yu<sup>b</sup>

<sup>a</sup> School of Information Science and Technology, Nantong University, Nantong 226019, China

<sup>b</sup> Key Laboratory of Polar Materials and Devices, Department of Optoelectronics, East China Normal University, Shanghai 200241, China

---

\* \* Corresponding author. Tel.: +86-513-8501-2626; Fax: +86-513-8501-2626. E-mail address: hhyin@ntu.edu.cn

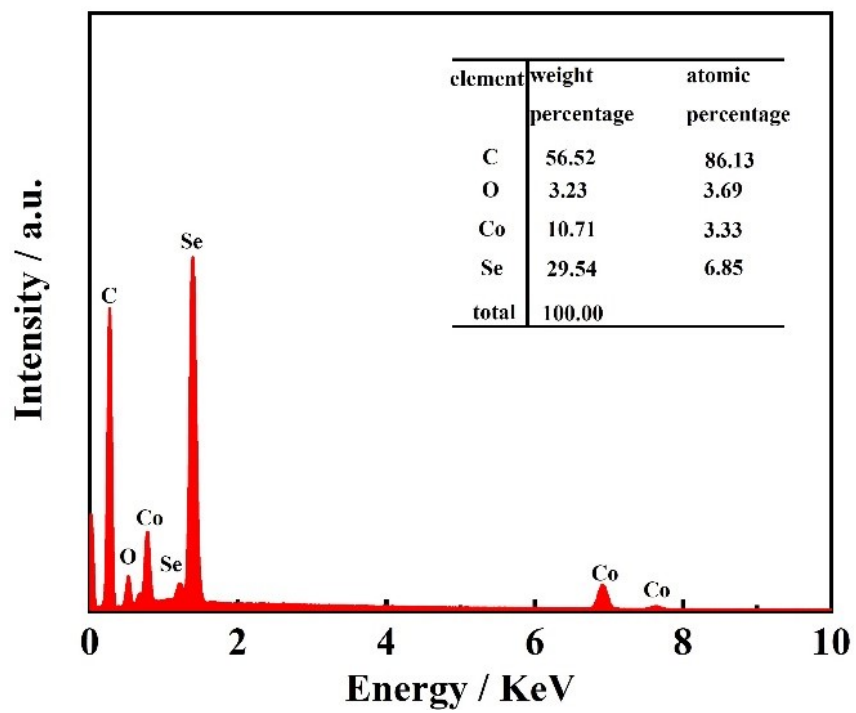

Fig. S1 the EDS spectrum of the CoSe<sub>2</sub>-CNWs@rGO.

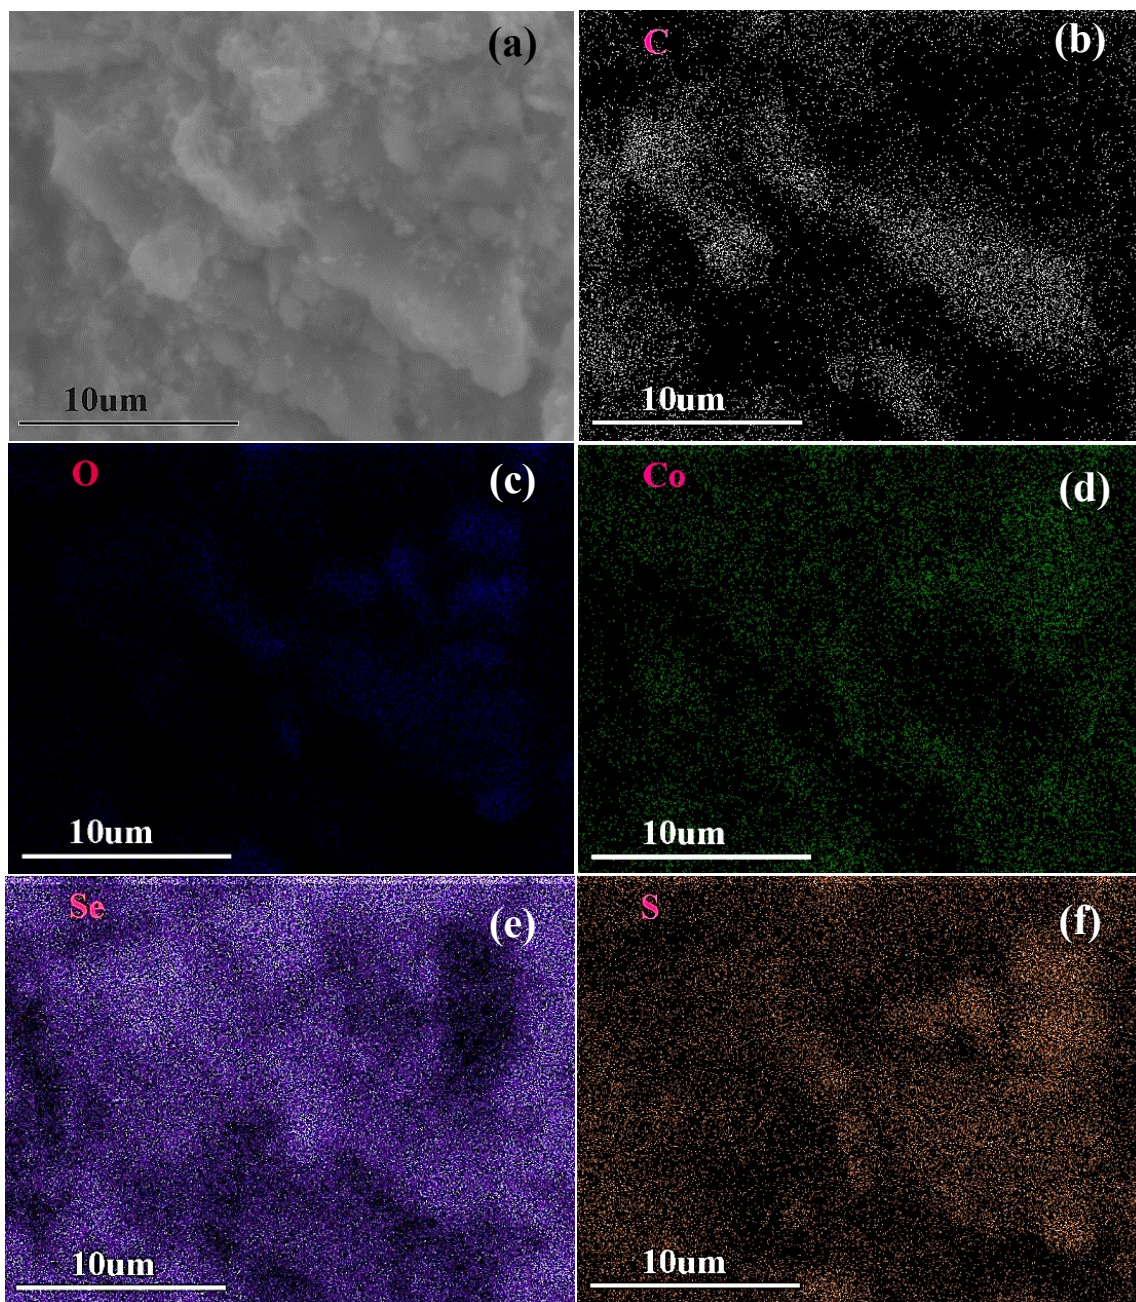

Fig. S2 SEM image and corresponding EDX elemental mapping of  $\text{CoSe}_2\text{-CNWs@rGO/S}$ .

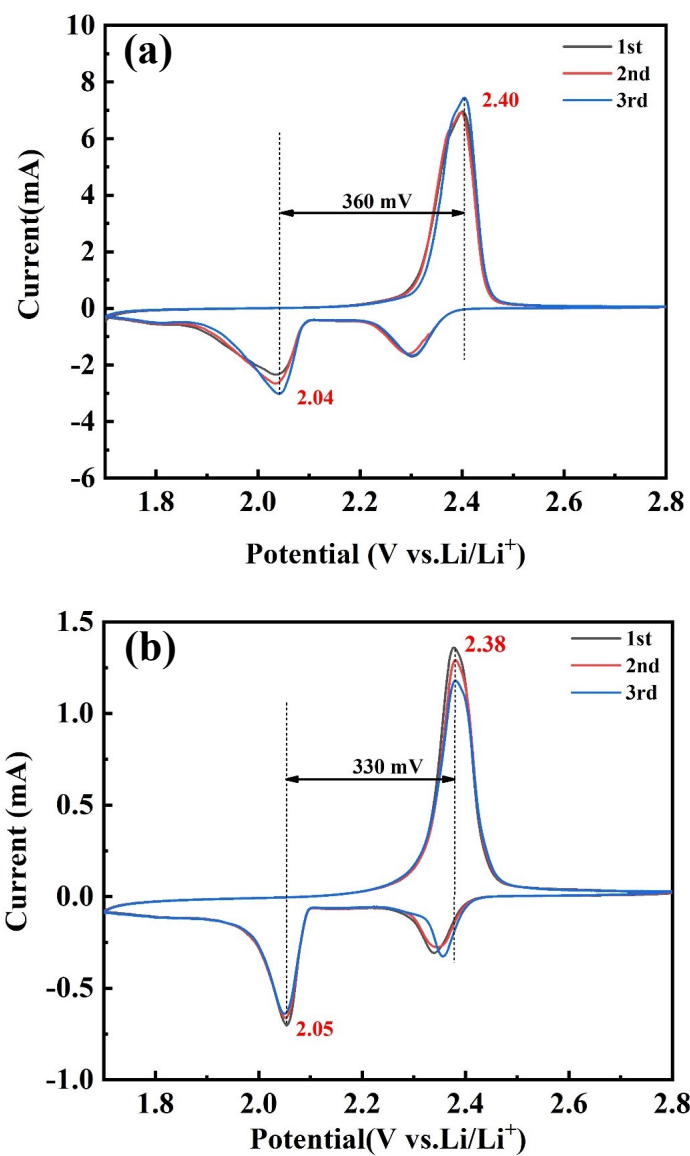

Fig. S3 CV curves of (a) Co-CNWS/S and (b) CoSe<sub>2</sub>-CNWS/S at 0.1 mV s<sup>-1</sup> in a potential window from 1.7 to 2.8 V.

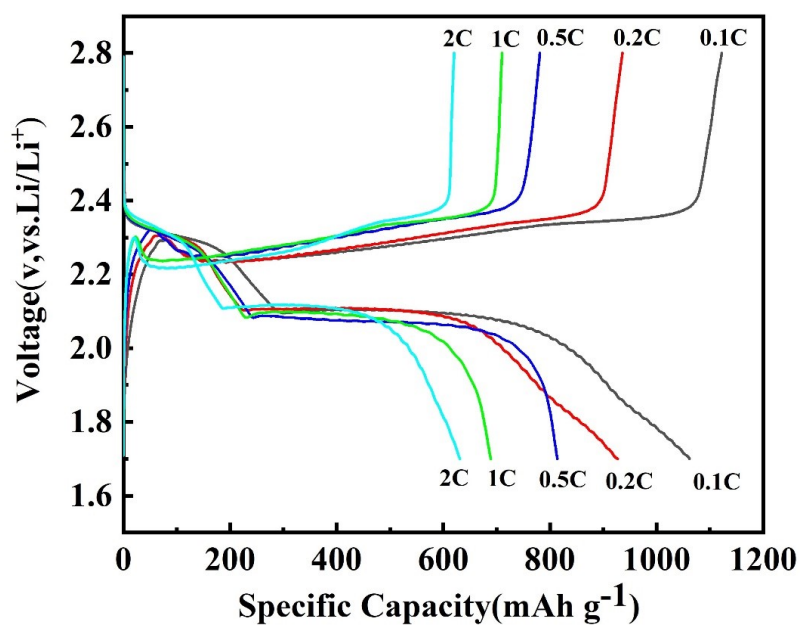

Fig. S4 The galvanostatic charge-discharge profiles of the CoSe<sub>2</sub>-CNWs@rGO/S cathode at different current density.

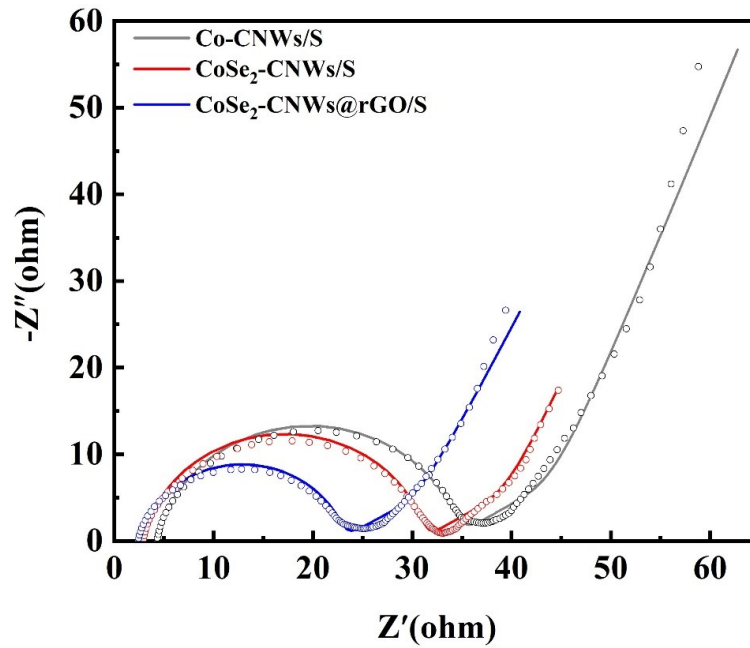

Fig. S5 Nyquist plots of Co-CNWs/S, CoSe<sub>2</sub>-CNWs/S, and CoSe<sub>2</sub>-CNWs@rGO/S electrodes before cycling.

Fig S5 shows the EIS plots of CoSe<sub>2</sub>-CNWs@rGO/S, CoSe<sub>2</sub>-CNWs/S, and Co-CNWs/S electrodes before cycling. The fitting values indicate the lowest  $R_e$  and  $R_{ct}$  in the CoSe<sub>2</sub>-CNWs@rGO/S electrode (2.67 and 20.68  $\Omega$ ), while the  $R_e$  and  $R_{ct}$  values in CoSe<sub>2</sub>-CNWs/S (3.05 and 27.91  $\Omega$ ) and Co-CNWs/S (4.37 and 30.69  $\Omega$ ) are much higher. This results confirm the enhancement of the cathode conductivity due to the coupling with CoSe<sub>2</sub> and rGO.
